1 **Title:** The urban-adapted underground mosquito, *Culex molestus*, maintains exogenously influenced  
2 circadian rhythms despite an absence of photoperiodically induced dormancy

3  
4 **Authors:** Natalie R. Epstein<sup>1</sup>, Kevin Saez<sup>1</sup>, Asya Polat<sup>1</sup>, Steven R. Davis<sup>2</sup>, Matthew L. Aardema<sup>1,3,\*</sup>

5  
6 <sup>1</sup> Department of Biology, Montclair State University, 1 Normal Ave, Montclair, NJ 07043, USA.

7 <sup>2</sup> Division of Invertebrate Zoology, American Museum of Natural History, 200 Central Park West New  
8 York, NY 10024-5102, USA.

9 <sup>3</sup> Sackler Institute for Comparative Genomics, American Museum of Natural History, 200 Central Park  
10 West New York, NY 10024-5102, USA.

11  
12 \* Author for correspondence (aardemam@montclair.edu)

13  
14 **KEY WORDS:** Clock genes, life-history traits, diapause, Culicidae, *Helicase domino*

15

16

17

18

19

20

21

22

23

24

25

26

27 **ABSTRACT**

28 In temperate climates, the mosquito *Culex molestus* lives almost exclusively in urban underground locations  
29 such as flooded basements, sewer systems and subway tunnels. Unlike most other mosquito taxa found at  
30 higher latitudes, *Cx. molestus* remains active and continues to breed throughout the winter. This is  
31 attributable to year-round above freezing temperatures in its preferred underground habitats combined with  
32 an inability to enter a state of arrested development ('diapause') in response to shortening photoperiods in  
33 autumn. Prior studies have shown that the genes associated with circadian rhythms (i.e. 'clock genes') also  
34 influence the photoperiodic induction of diapause in the closely related mosquito, *Cx. pipiens*. These results  
35 suggest that molecular changes in one or more clock genes could contribute to the absence of  
36 photoperiodically induced diapause in *Cx. molestus*. As *Cx. molestus* predominantly inhabits underground  
37 locations generally devoid of a predictable photoperiod, such mutations may not be removed by purifying  
38 selection as they would have minimal fitness consequences. To examine the possibility that *Cx. molestus*-  
39 specific genetic changes in one or more clock genes correlate with its inability to enter a photoperiodically  
40 induced dormant state, we first used genomic data to search for inactivating mutations or other structural  
41 variants in genes known to influence circadian rhythms in Diptera ('flies'). We further investigated non-  
42 synonymous, derived genetic divergence in this same class of genes. Next, we generated transcriptome data  
43 from multiple life-stages of *Cx. molestus* to survey binary expression of annotated clock genes throughout  
44 this mosquito's lifecycle. Finally, we carried out experimental studies to assess the extent to which *Cx.*  
45 *molestus* retains exogenously influenced circadian rhythms, and whether it harbors any tendencies towards  
46 dormancy when exposed to a shortened photoperiod. Our results indicate that the gene Helicase domino  
47 (*dom*) has a nine-nucleotide, in-frame deletion specific to *Cx. molestus*. Previous work has shown that splice  
48 variants in this gene influence circadian behavior in *Drosophila melanogaster*. We also find derived, non-  
49 synonymous single nucleotide polymorphisms (SNPs) in eight genes that may also affect circadian rhythms  
50 and/or diapause induction in *Cx. molestus*. Four other circadian genes were found to have no quantifiable  
51 expression during any examined life stage, suggesting potential regulatory variation. Our experimental  
52 results confirm that *Cx. molestus* retains exogenously-influenced circadian rhythms but is not induced to

53 enter a dormant state by a shortened photoperiod. Collectively, these findings show that the distinct, but  
54 potentially molecularly interconnected life-history traits of diapause induction and circadian rhythms are  
55 decoupled in *Cx. molestus* and suggest that this taxon may be a valuable tool for exploring exogenously  
56 influenced phenotypes in mosquitoes more broadly.

57

## 58 **INTRODUCTION**

59 Examining the ways in which distinct life-history traits are linked to one another can provide a better  
60 understanding of the mechanisms through which organisms adapt to, or are constrained by, environmental  
61 conditions (Blows and Hoffmann, 2005; Mauro and Ghalambor, 2020). In insects, two important life-  
62 history traits that are tightly linked to environmental variation are circadian rhythms and seasonal dormancy  
63 in response to prolonged, adverse climatic conditions (Tauber and Tauber, 1981; Danks, 1987; Kyriacou et  
64 al., 2008). Individual variation in both of these traits can have substantial fitness consequences, with mis-  
65 timed behavioral responses leading to reduced or absent mating opportunities, reduced access to food  
66 resources, or increased probability of mortality (Danks, 1987; Yerushalmi and Green, 2009).

67 For both circadian rhythms and seasonal dormancy, the perception of external light cues plays an  
68 important role in their initiation and/or maintenance (Beck, 1980; Denlinger et al., 2017). Insect circadian  
69 rhythms are usually exogenously entrainable, with the daily succession of light and dark influencing many  
70 biological processes that oscillate over a 24-hour period. This entrainability allows individuals to adjust  
71 their behavior to match seasonal or geographic variation in day-length (Meireles-Filho and Kyriacou, 2013).  
72 A dormancy response to predictable seasonal changes, such as colder periods in temperate climates (i.e.  
73 ‘winter’), is also often strongly influenced by changes in daylength (Adkisson, 1966). In insects, one of the  
74 most common responses to oncoming inclement weather that is seasonally consistent is diapause. Insect  
75 diapause is a state of dormancy in which growth and development is halted until the environment changes  
76 to more favorable conditions (Tauber and Tauber, 1976). It is common in insects living in temperate regions  
77 where the summers are warm with long days and the winters are cold with short days (Denlinger, 2002).

78 Mosquitoes of the *Culex pipiens* species complex are important disease vectors of many arboviruses  
79 including West Nile virus and Saint Louis encephalitis (Fonseca et al., 2004). For this reason, understanding  
80 the nature and manifestation of circadian rhythms and seasonal dormancy in these taxa has implications for  
81 vector population control and disease mitigation (Ewing et al., 2019). In one member of this complex, the  
82 Northern House Mosquito (*Culex pipiens*), only females enter diapause, spending the winter remaining  
83 relatively stationary in sheltered locations such as tree holes or natural overhangs (Vinogradova, 2000).  
84 These diapausing females experience no growth in their ovarian follicles and will not seek out a blood meal  
85 until spring and the termination of diapause (Denlinger and Armbruster, 2014). Like most diapausing  
86 insects, they rely on their metabolic reserves stored prior to entering the diapause state (Zhou and Miesfeld,  
87 2009). Male *Cx. pipiens* do not diapause and die with the onset of winter. *Cx. pipiens* populations go through  
88 multiple generations each year, and as such, diapause induction is facultative, being initiated by the shorter  
89 photoperiods and cooler temperatures experienced by larvae in late summer and autumn (Eldridge, 1968;  
90 Spielman and Wong, 1973).

91 As both circadian rhythms and the initiation of diapause are closely tied to external light cues, it is  
92 perhaps not surprising that they are correspondingly linked molecularly in *Cx. pipiens*, with many of the  
93 same genes influencing both life-history traits (e.g. Ikeno et al., 2010; Meuti and Denlinger, 2013). In  
94 females, functioning clock genes are required to initiate diapause (Meuti et al., 2015). Under long day,  
95 diapause-averting conditions, the suppressed expression of the genes period (*per*), timeless (*tim*), and  
96 cryptochrome2 (*cry2*) results in an elevated expression of pigment dispersing factor (*PDF*), which has a  
97 role in circadian timing and diapause induction. However, if *PDF* expression is suppressed in females  
98 reared in long day conditions, the diapause phenotype occurs. In short day, diapause-inducing conditions,  
99 the expression of *per*, *tim*, and *cry2* is elevated and the diapause phenotype occurs (Hand et al., 2016).

100 *Cx. pipiens*' broadly co-occurring sister taxon, *Cx. molestus*, is an urban adapted mosquito found  
101 predominately in cities where it lives in subterranean locations such as flooded basements, sewers and  
102 subway tunnels (Byrne and Nichols, 1999; Vinogradova, 2000). Both observational and experimental  
103 studies indicate that, unlike *Cx. pipiens*, this mosquito lacks an ability to enter a diapause state in response

104 to a shortened photoperiod (Richards, 1941; Spielman and Wong, 1973; Kassim et al., 2013; Nelms et al.,  
105 2013; Bajwa and Zuzworsky, 2016). The taxonomic status of *Cx. molestus* remains a challenging biological  
106 problem, and many authors treat it either as a subspecies or ecological form of *Cx. pipiens* (e.g.  
107 Vinogradova, 2000; Harbach, 2012). However, in addition to their important difference in diapause ability,  
108 they also differ in host preferences, mating behaviors, and the requirement of a blood meal prior to egg-  
109 laying (Fonseca et al., 2004). With regards to this last characteristic, one of the predominant distinguishing  
110 characteristics of *Cx. molestus* is an obligate need to lay one batch of eggs prior to seeking a vertebrate host  
111 ('autogeny'; Spielman, 1971). For the sake of simplicity, in this study we will refer to each taxon as *Cx.*  
112 *molestus* and *Cx. pipiens* respectively, with no implied taxonomic status intended.

113 In one study examining circadian rhythms in *Cx. molestus*, the authors concluded this taxon  
114 displays less sensitivity to photoperiod than other members of the genus (Chiba et al., 1981). In another  
115 study, it was shown that adult eclosion (the emergence of the adult from the pupal state) of *Cx. molestus*  
116 populations from Russia are less influenced by exogenous factors than are *Cx. pipiens* populations  
117 (Karpova, 2009). Finally, a third study showed that adult *Cx. pipiens* females from the United States  
118 displayed more flexibility in when they would take a blood meal compared to *Cx. molestus* populations  
119 (Fritz et al., 2014). The authors of this study suggested this may be explained by differences in response to  
120 photoperiod displayed by these two mosquito taxa. Taken together, these studies strongly support the  
121 hypothesis that exogenous entrainment of circadian rhythms via light cues may be diminished in *Cx.*  
122 *molestus*. As *Cx. molestus* inhabits predominantly underground locations, populations are unlikely to  
123 experience natural fluctuations in photoperiod. It is therefore possible that potential selection pressures to  
124 maintain a response to external photoperiod cues has been reduced or eliminated. This, in turn, could also  
125 have led to a potential loss in diapause ability.

126 In this study, we investigate the presence of *Cx. molestus*-specific genetic changes that may be  
127 associated with its inability to express a photoperiodically induced dormant state. Specifically, we postulate  
128 that an inactivating mutation or other major structural variant in one or more clock genes could  
129 simultaneously account for its inability to enter diapause and a likely reduction or loss of entrainable

130 circadian rhythms. We also look for non-synonymous single nucleotide polymorphism (SNPs, aka  
131 ‘missense mutations’) in these genes, and use expression data to survey possible regulatory influences.  
132 Finally, we experimentally examine photoperiodically entrainable circadian rhythms and diapause  
133 induction in a *Cx. molestus* population originating from New York City, postulating that both life-history  
134 traits are reduced or absent in this mosquito.

135

## 136 **MATERIALS AND METHODS**

### 137 **Identifying genes that may contribute to circadian rhythms and/or diapause**

138 One of the primary goals for this study was to identify *Cx. molestus*-specific genetic variation in genes  
139 potentially influencing circadian rhythms and diapause. To facilitate this, we took advantage of the  
140 assembled and annotated genome of the closely related mosquito, *Cx. quinquefasciatus* (VectorBase  
141 assembly CpipJ2; Arensburger et al., 2010). This taxon, the ‘Southern House Mosquito’, is a member of  
142 the *Culex pipiens* species complex (as are *Cx. molestus* and *Cx. pipiens*), and its annotated genome is  
143 frequently used in genetic and genomic comparisons between *Cx. molestus* and *Cx. pipiens* (e.g. Asgharian  
144 et al., 2015; Price and Fonseca, 2015; Aardema et al., 2020; Yurchenko et al., 2020). We first needed to  
145 determine which annotated *Cx. quinquefasciatus* genes potentially influence circadian rhythms and/or  
146 diapause. To do this, we used the search words ‘circadian’, ‘photoperiod’, ‘dormancy’, ‘light stimulus’ and  
147 ‘diapause’ to locate GO categories associated with these terms in *Drosophila melanogaster* (Flybase, Dmel  
148 Release 6.32; Thurmond et al., 2019). The specific GO terms found are listed in Table S1. Next, we  
149 determined all *D. melanogaster* genes that had a ‘biological process’ associated with one or more of these  
150 terms. The *D. melanogaster* peptide sequences for these genes were compiled into a dedicated FASTA file.  
151 Using a local protein-protein BLAST v. 2.7.1 (‘blastp’; Altschul et al., 1990), and these *D. melanogaster*  
152 sequences as our queries, we searched the annotated peptide sequences of *Cx. quinquefasciatus*, with an  
153 evalue of 1e-10 and default values for all other settings. We considered the ‘best’ matches (the longest  
154 sequence with the highest percent similarity) between *D. melanogaster* and *Cx. quinquefasciatus* as  
155 prospective orthologs, provided they had greater than 50% amino acid similarity across 100 or more amino

156 acids. This list of potential circadian genes in *Culex* contained 154 unique annotated sequences (Table S2),  
157 and it is these genes that we utilized in subsequent analyses (see below). Henceforth, these genes will be  
158 referred to as the ‘*Culex* circadian genes’.

159

### 160 **Structural variants in genes influencing circadian rhythms**

161 We wanted to determine if one or more *Culex* circadian genes harbored *Cx. molestus*-specific major  
162 structural variants or other potentially ‘inactivating’ mutations that could correlate with its insensitivity to  
163 photoperiod in the induction of a dormancy state. To do this, we mapped previously published *Cx. molestus*  
164 genomic short-read Illumina data (NCBI-SRA accession numbers: SRR10053379, SRR10053380, and  
165 SRR10053386) to the *Cx. quinquefasciatus* genome (Arensburger et al., 2010) using the ‘MEM’ algorithm  
166 implemented in the program BWA v. 0.7.15 (Li, 2013) with default settings. The sample used to produce  
167 these genomic reads came from a New York City-derived lab strain of *Cx. molestus* (Aardema et al., 2020).  
168 After mapping, we marked duplicate reads with the MarkDuplicates function in Picard v. 1.77  
169 (<http://broadinstitute.github.io/picard/>), then performed indel realignment using the IndelRealigner function  
170 of the Genome Analysis Toolkit v. 3.8 (‘GATK’; McKenna et al., 2010). Next, we determined genotype  
171 likelihoods using the ‘mpileup’ command in bcftools v. 1.9 (Li et al., 2009), then identified sites divergent  
172 from the reference using the ‘call’ command, also with bcftools. These divergent sites included both single  
173 nucleotide polymorphism (SNPs) and insertion/deletions (INDELS). We then used the program SnpEff v.  
174 4.3 (Cingolani et al., 2012) with a custom database for the gene annotations of *Cx. quinquefasciatus* to  
175 annotate these variants with default parameters. We cross-referenced the gene summary produced by the  
176 SnpEff program with our list of 154 *Culex* circadian genes, identifying those on the list that were determined  
177 to have a ‘high’ impact variant. Potential high impact variants included frameshift mutations, loss of the  
178 start codon, gain of a stop codon, loss of the stop codon, or disruption of an exonic splice site. This cross-  
179 referencing generated 33 *Culex* circadian genes that had one or more potential structural variants or other  
180 mutations of great effect.

181 To test whether these variants were valid (i.e. not an artifact of incorrect annotation), we wanted to  
182 determine that the expressed coding gene structure in *Cx. molestus* matched that of the *Cx. quinquefasciatus*  
183 gene annotation. We also wanted to assess if the variant(s) were both found in a broad geographic  
184 representation of *Cx. molestus* samples, and were not present in the sister taxon, *Cx. pipiens*. To do this, we  
185 *de novo* assembled two *Cx. molestus* transcriptomes (from samples deriving from the United States and  
186 Germany, respectively [Table S3]) and two *Cx. pipiens* transcriptomes (also from samples deriving from  
187 the United States and Germany), using the program Trinity v. 2.8.4 with default parameters (Haas et al.,  
188 2013). We performed a nucleotide-nucleotide BLAST v. 2.7.1 ('blastn') with the target exon containing the  
189 potential inactivating mutations as our query sequence and each of these four assembled transcriptomes as  
190 our database. Using RNA-seq (transcriptome) data allowed us to simultaneously confirm accurate  
191 annotation of the gene and that the focal variant was present in both North American and European *Cx.*  
192 *molestus*, but not in the closely-related *Cx. pipiens*.

193 If our analysis from these four transcriptomes supported a correct annotation of the focal gene and  
194 additionally if the potential 'large-effect' variant was present in both *Cx. molestus* samples and neither *Cx.*  
195 *pipiens* sample, we then examined its presence/absence in four additional *de novo* assembled genomes from  
196 two *Cx. molestus* samples (one from Belarus and the aforementioned NYC sample; see Table S3), and two  
197 *Cx. pipiens* samples (one from Belarus and one from New Jersey; see Table S3). These *de novo* assemblies  
198 were done with the program ABySS v. 2.2.3 (Jackman et al., 2017), with K values from 56 to 96 at 10  
199 nucleotide intervals. The 'best' assembled genome was chosen as the K value with the highest E-size (a  
200 measure of probable gene completeness; Lian et al., 2014), as determined with 'abyss-fac'. Again, we used  
201 a nucleotide-nucleotide BLAST v. 2.7.1 ('blastn') with the target exon containing the potential inactivating  
202 mutations as our query sequence and each of these four assembled genomes as our database.

203

## 204 **Genetic Divergence Between Diapausing and Non-Diapausing *Culex* Forms**

205 In addition to possible structural variants in genes known to influence diapause and circadian rhythms, it is  
206 possible that derived amino acid changes could also impact the expression of these traits. To examine this



207 possibility, we took advantage of previous research comparing non-synonymous divergence ( $K_a$ ) between  
208 New York City *Cx. molestus* and a *Cx. pipiens* population from Germany (Price and Fonseca, 2015). We  
209 first compared our *Culex* circadian gene list to those which were found to have a  $K_a$  value greater than zero  
210 (indicating non-synonymous divergence between *Cx. molestus* and *Cx. pipiens*). From this comparison, we  
211 derived a list of 49 gene candidates to investigate potential derived amino acid changes in *Cx. molestus*.

212         Next, we used a local nucleotide-nucleotide BLAST v. 2.7.1 ('blastn') to compare each exon within  
213 each of these 49 genes from the annotated *Cx. quinquefasciatus* genome to each of the four previously  
214 described *de novo* genome assemblies (two *Cx. molestus* samples and two *Cx. pipiens* samples; see above).  
215 We aligned these four focal sequences with the *Cx. quinquefasciatus* focal exon and the full gene sequence  
216 to maintain the correct reading frame (in relation to the annotation). Sequence gaps, codons that spanned  
217 an intron and regions that were not present in all four focal genomes were removed. After all exon regions  
218 were located, aligned and trimmed, these sequences were concatenated into a single sequence, then  
219 converted to amino acids. Alignment, trimming and amino acid conversion was done with SeaView v. 4.6.3  
220 (Gouy et al., 2010). Using a custom Perl script, we counted the number of derived amino acid changes  
221 observed in each genome (relative to *Cx. quinquefasciatus*).

222

### 223 **Expression of Clock Genes**

224 To assess the presence of potential inactivating mutations in *Culex* circadian genes, we generated RNA-seq  
225 data for four *Cx. molestus* life stages: larva, pre-pupa, pupa and adult. For each library we combined 10  
226 individual heads, then extracted mRNA using Trizol. The goal of our analysis was not to quantify  
227 differences in expression levels per se, but rather to look for the complete absence of any gene expression.  
228 We deemed it equally informative and more cost-effective to increase the number of reads sequenced for  
229 each of the four life stage libraries, rather than produce independent biological replicates for each life-stage.  
230 Pooled samples, especially when the number of reads is high, have been shown to improve the power to  
231 detect gene expression of transcripts present at low abundances (Takele Assefa et al., 2020). Our use of  
232 pooled samples here, sequenced to produce a relatively high number of reads (>20 million each), should

233 have facilitated an accurate representation of binary gene expression (expressed or not expressed), even for  
234 genes expressed at low levels.

235         After RNA extraction, we next prepared sequencing libraries following the Illumina TruSeq  
236 protocol, incorporating Covaris shearing as an alternative to chemical shearing and excluding the cDNA  
237 DSN normalization step. Paired-end sequencing was performed on a HiSeq2000 platform. We mapped the  
238 resulting reads from each sample to the *Cx. quinquefasciatus* genome with STAR v. 2.5.2 (Dobin et al.,  
239 2013, Dobin and Gingeras, 2015) as implemented in RSEM v. 1.3.1 (Li and Dewey, 2011). RSEM was  
240 then used to calculate the Transcripts per Kilobase Million (TPM) and Fragments Per Kilobase of transcript  
241 per Million mapped reads (FPKM) for all genes in each of the four samples. We considered any measure  
242 of either TPM or FPKM above zero as evidence of possible gene expression.

243

#### 244 **Exogenous Influences on Circadian Rhythms**

245 To complement our genetic analyses, we wanted to assess whether *Cx. molestus* displays behaviors that can  
246 be influenced by exogenous influences, specifically variation in light cues. To do this, we utilized a lab  
247 colony of *Cx. molestus* that originates from adult females collected in a New York City, NY residential  
248 basement in December 2010 (Price and Fonseca, 2015). It has been continuously maintained in various labs  
249 from that time to the present. Adults in our lab colony are kept in 60 cm<sup>3</sup> screened flight cages (BugDorm-  
250 2120 Insect Rearing Tent), where they are allowed to mate freely. They are given access to an 8% sucrose  
251 solution *ad libitum*. As *Cx. molestus* are autogenous, females do not require a blood meal before they will  
252 lay eggs. To start a new generation, we collect egg rafts by placing a black takeout food tray (henceforth,  
253 “oviposition trays”) with 400 mL of dechlorinated water into the cages for 48 hours. We then remove these  
254 trays and allow the eggs to hatch. For colony maintenance, early instar (first and second) larvae are  
255 transferred from the oviposition trays to 600 mL of dechlorinated water in 1 L white plastic deli containers.  
256 We feed larvae a diet of TetraMin tropical fish flakes approximately once per week, with the amount  
257 varying depending on larvae size and density. Individuals are allowed to pupate in these containers and

258 upon emergence, adults are transferred to the aforementioned flight cages. All life stages are maintained at  
259 ambient temperatures in a windowless room with no fixed light cycle.

260 Over three separate trials, we obtained 17 egg rafts from our maintenance colony as described  
261 above. After hatching, we placed five to fifteen larvae from each family into a 100 mL glass jar with 50 mL  
262 of dechlorinated water. These jars were then kept in a TriTech<sup>TM</sup> Research Digitherm® 38-liter  
263 Heating/Cooling Incubator, with optional light blocking door coating and seal  
264 (<https://www.tritechresearch.com/DT2-MP-47L.html>) at one of four environmental conditions: 12:12  
265 light:dark (lights on at 06:00, lights off at 18:00), 12:12 dark:light (lights off at 06:00, lights on at 18:00),  
266 24 hours of light, or 24 hours of dark. All four incubators were kept at 23 °C and larvae were fed as described  
267 above with the amount varying based on larval size and density.

268 After pupation, we transferred individual pupae into polystyrene ‘wide’ drosophila vials (Genesee  
269 Scientific) that contained approximately 25 mL of dechlorinated water. These vials were then moved into  
270 a dark chamber with a light regime of 12:12 light:dark (lights on at 06:00, lights off at 18:00). During the  
271 dark period, a red light would come on once every hour for one minute in order to help detect any emergence  
272 activity. Adult emergence was filmed using a YI 1080p home security camera with night vision capability.  
273 Video technology such as this has been used to record mosquito behavior and activity in laboratory settings  
274 previously, including under light-dark and constant dark conditions (e.g. Araujo et al., 2020). We focused  
275 on the transition event (eclosion) between the pupal and adult states because it is relatively quick and  
276 discrete, and is easily noted in video footage (see Fig. S1).

277 We reviewed all the video recordings and documented the times of all emergences that occurred  
278 during the trials, as evidenced by observing the mosquito emerging from its pupal case or else the first point  
279 at which an adult was observed treading on the surface of the water (Fig. S1). For the purposes of analysis,  
280 we converted minutes into decimals (i.e. an adult emergence at 12:30 was recorded at 12.50). The Rayleigh  
281 Test was used to test for uniformity of the data (i.e. if adult emergence occurred at a certain time of the  
282 day). Our null hypothesis was that there was no pattern displayed in the adult eclosion of *Cx. molestus*. To  
283 test for differences between treatments, we used the Watson-Williams Test of Homogeneity of Means,

284 performing all pairwise comparisons. All statistical analyses were done in R v. 4.0.2 (R Core Team, 2020),  
285 utilizing the ‘circular’ package (Agostinelli and Lund, 2017), and statistical significance was considered at  
286  $\alpha \leq 0.05$ .

287

### 288 **Photoperiodically induced Dormancy (Quiescence or Diapause)**

289 A true diapause state in female *Culex* mosquitoes is typically assayed by removing the ovaries and  
290 measuring the length of the follicles (e.g. Eldridge, 1968; Spielman and Wong, 1973; Sim and Denlinger,  
291 2008; Meuti et al., 2015). All North American *Cx. molestus* populations examined in this manner have been  
292 shown to undergo ‘normal’ ovarian development when reared in short-day conditions (Spielman and Wong,  
293 1973; Nelms et al., 2013). However, some members of the *Culex pipiens* species complex, such as *Cx.*  
294 *australicus*, are known to enter a quiescent state during inclement weather, that while not true diapause,  
295 nonetheless appears to be an adaptation to variable climates (Dobrotworsky and Drummond, 1953;  
296 Dobrotworsky, 1967). It is possible that a dormant state more akin to quiescence than to diapause (and  
297 independent of ovarian arrest) could be induced in *Cx. molestus* in response to photoperiodic cues (Diniz  
298 et al., 2017). Therefore, we wanted to assess whether our New York City *Cx. molestus* line expressed any  
299 degree of ecologically-relevant dormancy (e.g. ‘quiescence’) in response to a short photoperiod.

300 To do this, we collected egg rafts from 12 different females from our stock colony using oviposition  
301 trays in the manner described above. Each raft was isolated as a single family group and retained at 18 °C  
302 with a 12:12 Light:Dark (L:D; 7:00 - 19:00) photoperiod. Prior to their hatching, we gave each family group  
303 100 µl of a solution made from vigorously blending 100 milligrams of fish flakes into 10 mL of  
304 dechlorinated water. 24 hours after hatching, we split each family group into approximately equivalent  
305 (numerically) groups that were then assigned to one of two photoperiod conditions, ‘long day’ and ‘short  
306 day’. Larvae placed in long-day conditions were kept in an 18:6 L:D photoperiod (4:00 - 22:00) at 18 °C,  
307 whereas larvae in short-day conditions were kept in a 6:18 L:D photoperiod (10:00 -16:00), also at 18 °C.  
308 All egg, larval and pupal environmental conditions were maintained utilizing a TriTech™ Research

309 Digitherm® 38-liter Heating/Cooling Incubator, with optional light blocking door coating and seal  
310 (<https://www.tritechresearch.com/DT2-MP-47L.html>). First and second instar larvae were given 200 µl of  
311 fish flake feeding solution daily, third instar larvae were given 400 µl daily, and fourth instar larvae were  
312 given 800 µl daily.

313       Upon pupation, individual mosquitoes were placed in a 100 mL glass jar with 50 mL of  
314 dechlorinated water. These pupae were maintained in the same environmental conditions as the larvae,  
315 depending on treatment group (long day vs. short day). When they eclosed (emerged as adults), we moved  
316 adult females to a flight cage with virgin males from a separate, dedicated mating pool. Males from this  
317 mating pool were maintained in the long day photoperiod at 20 °C from hatching to adulthood. The slightly  
318 higher temperature was to ensure that males reached sexual maturity before their interaction with  
319 experimental females. Males were at least three days old prior to the introduction of experimental females  
320 to ensure these males were sexually active (Vinogradova, 2000). Furthermore, we maintained a ratio of two  
321 virgin males to each experimental female in each flight cage.

322       To maximize the likelihood of insemination, we kept females in the flight cages for 72 hours. These  
323 flight cages were maintained at long-day photoperiod (18:6), but ambient temperature ( $\sim 25\text{ °C} \pm 2\text{ °C}$  during  
324 the duration of the study). After 72 hours, females were placed individually into 100 mL glass jars with 50  
325 mL of dechlorinated water to lay eggs. These jars were kept in long day conditions and at ambient  
326 temperature.

327       We examined multiple traits associated with reproductive activity in females. First, we compared  
328 the percentage of females from each treatment that laid eggs within ten days after being placed in an  
329 oviposition jar. Females *Cx. molestus* typically lay eggs within four to five days after eclosion when  
330 maintained at 25 °C and six to nine days when maintained at 20 °C (Vinogradova, 2000). In contrast, after  
331 diapause termination, the sister taxon *Cx. pipiens* generally requires ten days before ovarian follicle  
332 development and the laying of eggs (Tate and Vincent, 1936). For individual females, we recorded the time  
333 to lay eggs (checked every 12 hours at 9:00 and 21:00), and the number of eggs laid. To count the number

334 of eggs, we used a Nikon stereoscopic microscope (model C-PS) with a Gosky 10X microscope Smartphone  
335 Camera Adaptor to photograph each egg raft at 40x magnification. The eggs within each image were then  
336 marked and counted digitally using the program ImageJ v. 1.53a (Schneider et al., 2012). Because a  
337 female's size can influence the number of eggs she lays (Vinogradova, 2000), we also measured wing length  
338 as a proxy for size using a metric miniscale (<https://www.bioquip.com/search/DispProduct.asp>  
339 ?pid=4828E). Females were killed with ethyl acetate prior to wing measurement.

340

## 341 **RESULTS**

### 342 **The gene, *Helicase domino*, harbors a *Cx. molestus*-specific structural variant**

343 Our analysis of potential 'large effect' variants in *Culex* circadian genes identified 33 candidate genes  
344 (Table S4). However, upon further examination and confirmation, 32 of these genes were either not specific  
345 to the *Cx. molestus* samples examined, or else were mis-characterized due to apparent inaccuracies in the  
346 *Cx. quinquefasciatus* genome annotation. The single gene that was correctly annotated, present in only *Cx.*  
347 *molestus* samples, and absent from all *Cx. pipiens* samples, was a nine nucleotide, in-frame deletion in the  
348 fifth exon of the Helicase domino (*dom*) gene (Figure 1). This variant was present in *Cx. molestus* RNA-  
349 seq and genomic data from New York City, Germany, and Belarus, but absent in examined *Cx. pipiens*  
350 samples from similar, geographically proximate locations.

351

### 352 **Additional circadian genes harbor non-synonymous single nucleotide polymorphisms (SNPs)**

353 Based on previous analysis of non-synonymous divergence between *Cx. molestus* and *Cx. pipiens* (Price  
354 and Fonseca, 2015), we examined 49 *Culex* circadian genes for derived amino acid changes relative to *Cx.*  
355 *quinquefasciatus*. Of these, eight genes had one derived amino acid change (missense mutation) in both the  
356 examined New York City and Belarussian *Cx. molestus* genome samples, and which were absent in the  
357 New Jersey and Belarussian *Cx. pipiens* genome samples (Tables 1, S5). As annotated in *Cx.*  
358 *quinquefasciatus*, these genes were: 'calmodulin binding transcription activator 2', 'sodium chloride  
359 dependent amino acid transporter', 'dna photolyase', 'calmodulin-binding protein trpl', 'ultraviolet-

360 sensitive opsin', 'glycogen synthase kinase 3', 'phospholipase c', and a conserved hypothetical protein.  
361 There were 12 genes that had derived amino acid changes in both examined *Cx. pipiens* samples, with many  
362 genes harboring more than one missense mutation (21 total derived amino acid changes in *Cx. pipiens*).

363

#### 364 ***Culex* circadian gene expression in *Cx. molestus***

365 Our sequencing of four pooled libraries each constituting a distinct *Cx. molestus* life-stage (larvae, pre-  
366 pupae, pupae, and adult) resulted in over 21 million read pairs per library (Larvae: 24.7M; Pre-pupae:  
367 23.6M; Pupae: 21.1M; Adult: 22.4M). This sequencing data is deposited in the NCBI SRA database  
368 (accession numbers SRRXXXXXXXX-SRRXXXXXXXX). Of the 154 identified *Culex* circadian genes, all  
369 but four had evidence of expression in at least one *Cx. molestus* life history stage (Tables 2, S6). These four  
370 genes are annotated in the *Cx. quinquefasciatus* genome as 'AMP dependent ligase', 'tubulin beta-3 chain',  
371 'Dual specificity tyrosine-phosphorylation-regulated kinase', and an uncharacterized protein. This last gene  
372 appears most similar to 'E3 ubiquitin-protein ligase TRIP12' in *Drosophila melanogaster*. Six other genes  
373 were very lowly expressed (TPM & FPKM < 1) in only one of the four examined life stages (Tables 2, S6).

374

#### 375 **Exogenously-influenced circadian rhythms are retained**

376 The Rayleigh test indicated that all treatments displayed clustering in the data (Figure 2; LD: 0.6042, P <  
377 0.001; DL: 0.3413, P < 0.001, LL: 0.2051, 0.009, DD: 0.2301, P = 0.0045). The mean emergence time for  
378 *Cx. molestus* adult eclosion for individuals reared in 12:12 light:dark ('LD', lights on at 06:00, lights off at  
379 18:00) was 21:58 (SD±1:00), approximately four hours after the onset of the dark cycle during larval  
380 development. For individuals reared in 12:12 dark:light ('DL') the mean was 10:08 (SD±1:28), again  
381 approximately four hours after the onset of the dark cycle during larval development. The mean adult  
382 eclosion time for individuals reared in constant light ('LL', 24 hours light) was 20:15 (SD±1:47), and for  
383 individuals reared in constant dark ('DD', 24 hours dark) was 17:50 (SD±1:43). In our pairwise  
384 comparisons, we observed a statistically significant difference between our LD and DL treatments  
385 ( $W_2=75.199$ ,  $p < 0.001$ ), between our LD and LL treatments ( $W_2=22.821$ ,  $p < 0.001$ ), between our LD and

386 DD treatments ( $W_2=32.759$ ,  $p < 0.001$ ), between our DL and LL treatments ( $W_2=28.856$ ,  $p < 0.001$ ), and  
387 between our DL and DD treatments ( $W_2=20.602$ ,  $p < 0.001$ ). Between our LL and DD treatments, there  
388 was no significant difference ( $W_2=2.2454$ ,  $p = 0.3254$ ).

389

### 390 **Absence of photoperiodically induced dormancy**

391 Of the 109 females set up for oviposition from those reared in long-day conditions, 102 laid eggs (93.6%),  
392 and of the 101 females set up for oviposition from those reared in short-day conditions 94 laid eggs (93.1%).  
393 On average, a female reared in long day conditions took 38.4 hours ( $SD\pm 33.8$ ) to lay eggs, and females  
394 reared in short day conditions took 47.9 hours ( $SD\pm 45.1$ ). The variance between the two groups was not  
395 statistically different (Levene's Test,  $F_{1,192}= 1.79$ ,  $p= 0.1825$ ), so we performed a t-test assuming equal  
396 variances. The results of this test indicated that there was no statistically significant difference in the time  
397 it took for females to lay eggs between treatments ( $t_{192}= -1.6683$ ,  $p = 0.097$ ).

398 On average, females reared in long-day conditions laid 81.4 eggs ( $SD\pm 18.3$ ), whereas females  
399 reared in short-day conditions laid an average of 97.8 eggs ( $SD\pm 15.8$ ). There was a statistically significant  
400 difference between the two treatments ( $t_{181.32}= -6.5394$ ,  $p < 0.001$ ). An ANOVA additionally showed that  
401 these differences between treatment were significant ( $F_{1,192}= 42.21$ ,  $p < 0.001$ ). However, there is a strong  
402 intraspecific relationship between mosquito size and number of eggs laid (Vinogradova, 2000), and we  
403 observed that on average female mosquitoes reared in long day conditions had a wing length of 4.38mm  
404 ( $SD\pm 0.21$ ), whereas females reared in short day conditions had an average wing length of 4.68mm  
405 ( $SD\pm 0.16$ ). This difference was significant ( $t_{174.67} = -10.851$ ,  $p < 0.001$ ). When we controlled for these  
406 observed differences in size using an ANCOVA, there was no difference between the treatments  
407 ( $F_{1,181}=0.350$ ,  $p = 0.555$ ). Figure 3 shows the relationship between wing size and the number of eggs laid  
408 for both treatment groups.

409

410

411



## 412 Discussion

413 Despite their ecological differences in habitat preference and diapause induction ability, the amount of  
414 genetic divergence in genes potentially influencing circadian rhythms and/or overwintering behavior  
415 between the *Cx. molestus* and *Cx. pipiens* samples examined here was minimal, with most genes having no  
416 non-synonymous differences. This agrees with the close, and often challenging, taxonomic relationship of  
417 these two mosquitoes (e.g. Smith and Fonseca, 2004; Fonseca et al., 2004; Aardema et al., 2020). Of the  
418 154 *Culex* circadian genes we examined, only one harbored a *Cx. molestus*-specific structural variant. This  
419 gene, Helicase domino (*dom*), was found to have a nine nucleotide, in-frame deletion in all *Cx. molestus*  
420 samples surveyed. Given that in *Drosophila melanogaster*, the *dom* protein appears to have many other  
421 important functions (Ruhf et al., 2001; Liu et al., 2019), it is not surprising that the observed structural  
422 variant would not radically alter the sequence of this gene. However, it is still possible that the observed  
423 variant does have an influence on the expression of circadian rhythms and, correspondingly, diapause  
424 induction. In *D. melanogaster*, distinct splice variants of the *dom* gene dramatically impact circadian  
425 behaviors (Liu et al., 2019). In particular they affect the expression of the negative circadian regulators  
426 period (*per*) and timeless (*tim*). Interference of both these regulators via RNAi caused *Cx. pipiens* females  
427 that were reared in short day, diapause-inducing conditions to direct develop (Meuti et al., 2015). The effect  
428 that the nine-nucleotide deletion we observed in *Cx. molestus* has on the function of the *dom* protein,  
429 particularly in relation to *per* and *tim*, will require further investigation.

430 In addition to this structural variant, we also found eight genes that each harbored one derived, non-  
431 synonymous amino acid change (missense mutation) in *Cx. molestus* samples, but not *Cx. pipiens* samples.  
432 One of these genes encodes for the protein phospholipase c. In *D. melanogaster*, this gene (*norpA*,  
433 FBgn0262738) is predominately expressed in the eyes, and mutations in this gene ultimately affect the  
434 visual input pathway and circadian entrainment (Collins et al., 2004). This gene may also regulate splicing  
435 of the *per* gene, which could impact both circadian rhythms and diapause. Another gene observed to have  
436 a non-synonymous change in *Cx. molestus* was the glycogen synthase kinase 3. In *D. melanogaster* the  
437 protein encoded by this gene (*sgg*, FBgn0003371) can influence phosphorylation of *tim* and likely also

438 impacts *per* (Martinek et al., 2001). Intriguingly, expression of another glycogen synthase gene in *Cx.*  
439 *pipiens* was shown to impact the regulation of glycogen and lipid storages during diapause, and it was  
440 deemed essential for survival during winter dormancy (King et al., 2020).

441         Among the genes that were not expressed in any assessed *Cx. molestus* life-stage, ‘AMP dependent  
442 ligase’, is perhaps most interesting. This gene appears to be homologous with the *Drosophila* gene ‘Very  
443 long-chain-fatty-acid--CoA ligase bubblegum’ (*bgm*, FBgn0027348), which is predominantly a metabolic  
444 gene that influences fatty acid and lipid metabolism, but which also regulates the circadian sleep/wake cycle  
445 (Thimgan et al., 2014). In bumblebees, this gene appears to be upregulated prior to the onset of diapause  
446 (when metabolic reserves are being accumulated in the body), and downregulated during the actual diapause  
447 period (Amsalem et al., 2015). More broadly, it has been found that many metabolic genes are differentially  
448 expressed between diapausing and non-diapausing *Cx. pipiens* females (Kang et al., 2016), indicating the  
449 potential importance of such genes for successful diapause. While the observed amino acid change in this  
450 gene could potentially impact *Cx. molestus*’ ability to enter a dormancy state, it may also correlate with the  
451 absence of diapause in this mosquito and the lack of a need to accumulate large metabolic reserves.

452         Our experimental assessment of dormant tendencies showed that in conditions reported to induce  
453 diapause in the sister taxon, *Cx. pipiens*, there were no clear reductions in the tendency to lay, time to lay,  
454 nor number of eggs laid (when corrected for size). Indeed, females reared in short-day conditions (6:18  
455 L:D) during the larval stage actually laid more eggs than females reared in long-day conditions (18:6 L:D).  
456 This is the opposite trend we would predict if females reared in short-day conditions were induced towards  
457 any degree of reduced reproductive output by their rearing conditions. The simple explanation for the  
458 greater average number of eggs laid by short-day females is that they were generally larger. There is a  
459 strong positive correlation between *Culex* female size and the number of eggs laid (Vinogradova, 2000).  
460 However, why the females in this experiment should on average be larger is less clear. Perhaps the most  
461 parsimonious explanation is that the incubators set for short-day conditions were slightly cooler than those  
462 set for long-day conditions (due to the differences in the amount of time the lights were off/on respectively).  
463 Although we used internal thermometers to ensure the temperature settings were maintained at ~18 °C,

464 slight but consistent deviations from this temperature may have been sufficient to affect the size of these  
465 mosquitoes. Cooler temperatures during the larval period result in larger adult mosquitoes (Vinogradova,  
466 2000).

467         The complete absence of any reduced reproductive output in our experiment strongly suggests that  
468 this line of *Cx. molestus* lacks any ability to exhibit a photoperiodic inducible dormant state. However, the  
469 results from our circadian rhythms study indicate that *Cx. molestus* circadian behavior can be exogenously  
470 entrained by light cues (specifically the timing of the photoperiod) during the larval stage. This refutes our  
471 hypothesis that genetic changes in one or more *Cx. molestus* clock gene could simultaneously account for  
472 its inability to enter diapause and produce a reduction or loss of entrainable circadian rhythms. Our results  
473 clearly show that this taxon maintains photoperiodic perception and some degree of circadian entrainment  
474 influenced by this perception. However, as we only investigated photoperiodic entrainment within a single  
475 *Cx. molestus* population, it remains unclear whether the degree and strength of this entrainment differs from  
476 other populations or taxa in the *Culex* genus.

477         One challenge of this study is the reliance on the available annotation of the closely related species  
478 *Cx. quinquefasciatus*. The original genome annotation predominately utilized automated gene annotation  
479 pipelines with some comparison to other Dipteran genomes available at the time. However, in our analysis  
480 of potential structural variants in *Culex* circadian genes, we observed multiple genes that appear incorrectly  
481 annotated in relation to the sequence of these genes assembled from RNA-seq data. The proportion of the  
482 discrepancies between the genome annotation and RNA-seq data that represent bioinformatic limitations  
483 versus those that are isoform differences or other biological variation remains to be determined. Regardless,  
484 this particular challenge likely limited an accurate characterization of structural variants present in the taxa  
485 examined here.

486         More fundamentally, this study only points towards potential genetic candidates for genetic  
487 changes within *Cx. molestus* that may correlate with its inability to enter dormant state in response to  
488 photoperiodic cues. We can provide no causative evidence that these changes contribute to this phenotype  
489 presently. Furthermore, the changes we have characterized are all likely to be derived within the *Culex*

490 *pipiens* species complex. The justification for focusing on such derived genetic variation is that *Cx. molestus*  
491 is generally presumed to have evolved from a *Cx. pipiens* ancestor within relatively recent times (~10,000-  
492 80,000 years; Fonseca et al., 2004; Shaikevich, 2007). The evidence that *Cx. molestus* is the derived taxon  
493 is limited however, and it is interesting to note that our outgroup for comparisons, *Cx. quinquefasciatus*,  
494 also lacks an ability to enter a dormant state (Fonseca et al., 2004). If an absence of diapause is the ancestral  
495 condition in this mosquito group, and if *Cx. molestus* did not recently derive from the facultatively  
496 diapausing *Cx. pipiens*, then it is unlikely that derived genetic variation in contemporary populations is  
497 responsible for its inability to enter a dormant state in response to shortened photoperiods.

498

## 499 **Conclusions**

500 We have shown that in the urban-adapted mosquito, *Culex molestus*, the ability to entrain circadian rhythms  
501 in response to exogenous light cues is decoupled from its inability to enter a photoperiodically induced  
502 dormancy state. Because it can mate in enclosed spaces and does not require a blood meal to reproduce,  
503 *Cx. molestus* is commonly maintained in entomology and disease vector laboratories worldwide. Given its  
504 wide usage in understanding mosquito biology, our results indicate that this taxon may be a valuable tool  
505 for exploring exogenously influenced phenotypes, particularly those that display a circadian rhythm.  
506 Greater knowledge of circadian rhythms in mosquitoes is critical for controlling and mitigating mosquito-  
507 vectored illnesses (Rund et al., 2016). Specifically, understanding how seasonal changes in photoperiod  
508 fine-tune daily mosquito behaviors could greatly improve our knowledge of transmission potential for  
509 specific pathogens and vectors. In this study, we uncovered a structural variant in the Helicase domino gene  
510 that segregates with the taxa examined here, and correspondingly with the ability to enter a diapause state.  
511 Given the substantial influences this gene appears to have on circadian rhythms in *Drosophila*, and given  
512 that circadian genes are known to greatly impact diapause induction in *Culex*, this gene represents a major  
513 target for follow-up studies. Additional genetic variation uncovered here specific to *Cx. molestus* also offers  
514 further opportunities to investigate the genetic underpinnings of the diapause trait. A better understanding

515 of the genetic variation influencing diapause and circadian rhythms in *Culex pipiens* species complex  
516 mosquitoes more broadly may lead to improved vector control and a reduction in disease transmission.

517

## 518 **Acknowledgements**

519 We would like to thank David Epstein for helping design and build the lighting mechanism. Prof. Bridgett  
520 vonHoldt graciously provided space for our diapause induction experiment. NRE was supported in part by  
521 a Bonnie Lustigman Research Fellowship. KS received funding for this project from the Wehner Student  
522 Research Program.

523

## 524 **Data availability**

525 All raw RNA sequencing data have been deposited in NCBI's GenBank under accession numbers  
526 SRRXXXXXXXX-SRRXXXXXXXX.

527

## 528 **References**

529 **Aardema, M. L., vonHoldt, B. M., Fritz, M. L., and Davis, S. R.** (2020). Global evaluation of taxonomic  
530 relationships and admixture within the *Culex pipiens* complex of mosquitoes. *Parasit. Vectors.* **13**, 8.

531 **Adkisson, P. L.** (1966). Internal clocks and insect diapause. *Science.* **154**, 234-241.

532 **Agostinelli, C. and Lund, U.** (2017). R package 'circular': CircularStatistics (version 0.4-93). URL  
533 <https://r-forge.r-project.org/projects/circular/>.

534 **Altschul, S. F., Gish, W., Miller, W., Myers, E. W., and Lipman D. J.** (1990). Basic local alignment  
535 search tool. *J. Mol. Biol.* **215**, 403-410.

536 **Amsalem, E., Galbraith, D. A., Cnaani, J., Teal, P. E. and Grozinger, C. M.** (2015). Conservation and  
537 modification of genetic and physiological toolkits underpinning diapause in bumble bee queens. *Mol.*  
538 *Ecol.* **24**, 5596-5615.

539 **Arensburger, P., Megy, K., Waterhouse, R. M., Abrudan, J., Amedeo, P., Antelo, B., Bartholomay,**  
540 **L., Bidwell, S., Caler, E., Camara, F. et al.** (2010). Sequencing of *Culex quinquefasciatus* establishes  
541 a platform for mosquito comparative genomics. *Science.* **330**, 86-88.

- 542 **Araujo, M. D. S., Guo, F. and Rosbash, M.** (2020). Video recording can conveniently assay mosquito  
543 locomotor activity. *Sci. Rep.* **10**, 4994.
- 544 **Asgharian, H., Chang, P. L., Lysenkov, S., Scobeyeva, V. A., Reisen, W. K. and Nuzhdin, S. V.** (2015).  
545 Evolutionary genomics of *Culex pipiens*: global and local adaptations associated with climate, life-  
546 history traits and anthropogenic factors. *Proc. Biol. Sci.* **282**, 20150728.
- 547 **Bajwa, W. and Zuzworsky, J.** (2016). Subterranean populations of *Culex pipiens molestus* in New York  
548 City. In NCUE/IFA 2016 Proceedings, May 22-25. (ed. W. I. Bajwa), p. 106. Albuquerque, New  
549 Mexico: National Conference on Urban Entomology.
- 550 **Beck, S. D.** (1980). *Insect Photoperiodism Second Edition*. New York, USA: Academic Press.
- 551 **Blows, M.W. and Hoffmann, A.A.** (2005). A reassessment of genetic limits to evolutionary change.  
552 *Ecology.* **86**, 1371-1384.
- 553 **Byrne, K. and Nichols, R. A.** (1999). *Culex pipiens* in London Underground tunnels: differentiation  
554 between surface and subterranean populations. *Heredity.* **82**, 7-15.
- 555 **Chiba, Y., Yamakado, C. and Kubota M.** (1981). Circadian activity of the mosquito *Culex pipiens*  
556 *molestus* in comparison with its subspecies *Culex pipiens pallens*. *Int. J. Chronobiol.* **7**, 153-164.
- 557 **Cingolani, P., Platts, A., Wang, L., Coon, M., Nguyen, T., Wang, L., Land, S. J., Lu, X. and Ruden, D.**  
558 **M.** (2012). A program for annotating and predicting the effects of single nucleotide polymorphisms,  
559 SnpEff: SNPs in the genome of *Drosophila melanogaster* strain w1118; iso-2; iso-3. *Fly (Austin).* **6**, 80-  
560 92.
- 561 **Collins, B. H., Rosato, E. and Kyriacou, C. P.** (2004). Seasonal behavior in *Drosophila melanogaster*  
562 requires the photoreceptors, the circadian clock, and phospholipase C. *Proc. Natl. Acad. Sci. USA.*  
563 **101**, 1945–1950.
- 564 **Danks, H. V.** (1987). *Insect Dormancy: An Ecological Perspective*. Ottawa, Canada: Biological Survey of  
565 Canada (Terrestrial Arthropods).
- 566 **Denlinger, D. L.** (2002). Regulation of diapause. *Annu. Rev. Entomol.* **47**, 93-122.
- 567 **Denlinger, D. L. and Armbruster, P. A.** (2014). Mosquito diapause. *Annu. Rev. Entomol.* **59**, 73-93.
- 568 **Denlinger, D. L., Hahn, D. A., Merlin, C., Holzapfel, C. M. and Bradshaw, W. E.** (2017). Keeping time  
569 without a spine: what can the insect clock teach us about seasonal adaptation? *Philos. Trans. R. Soc.*  
570 **B. 372**, 20160257.
- 571 **Diniz, D., de Albuquerque, C., Oliva, L. O., de Melo-Santos, M. and Ayres, C.** (2017). Diapause and  
572 quiescence: dormancy mechanisms that contribute to the geographical expansion of mosquitoes and  
573 their evolutionary success. *Parasit Vectors.* **10**, 310.
- 574 **Dobin, A., Davis, C. A., Schlesinger, F., Drenkow, J., Zaleski, C., Jha, S., Batut, P., Chaisson, M. and**  
575 **Gingeras, T. R.** (2013). STAR: ultrafast universal RNA-seq aligner. *Bioinformatics.* **29**, 15-21.

- 576 **Dobin, A, Gingeras, T. R.** (2015). Mapping RNA-seq reads with STAR. *Curr. Protoc. Bioinformatics.*  
577 51:11.14.1–19.14.19.
- 578 **Dobrotworsky N. V.** (1967). The problem of the *Culex pipiens* complex in the South Pacific (including  
579 Australia). *Bull. World. Health. Organ.* **37**, 251–255.
- 580 **Dobrotworsky, N. V. and Drummond, F. H.** (1953). The *Culex pipiens* group in south-eastern Australia.  
581 *Proc. Linn. Soc. N.S.W.* **77**, 357-360.
- 582 **Eldridge, B. F.** (1968). The effect of temperature and photoperiod on blood-feeding and ovarian  
583 development in mosquitoes of the *Culex pipiens* complex. *Am. J. Trap. Med. Hyg.* **17**, 133-40.
- 584 **Ewing, D. A., Purse, B. V., Cobbold, C. A., Schäfer, S. M. and White, S. M.** (2019). Uncovering  
585 mechanisms behind mosquito seasonality by integrating mathematical models and daily empirical  
586 population data: *Culex pipiens* in the UK. *Parasit. Vectors.* **12**, 74.
- 587 **Fonseca, D. M., Keyghobadi, N., Malcolm, C. A., Mehmet, C., Schaffner, F., Mogi, M., Fleischer, R.**  
588 **C. and Wilkerson, R. C.** (2004). Emerging vectors in the *Culex pipiens* complex. *Science.* **303**, 1535–  
589 1538.
- 590 **Fritz, M. L., Walker, E. D., Yunker, A. J. and Dworkin, I.** (2014). Daily blood feeding rhythms of  
591 laboratory-reared North American *Culex pipiens*. *J. Circadian Rhythms.* **12**, 1.
- 592 **Gouy, M., Guindon, S. and Gascuel, O.** (2010). SeaView version 4: A multiplatform graphical user  
593 interface for sequence alignment and phylogenetic tree building. *Mol. Biol. Evol.* **27**, 221-224.
- 594 **Haas, B. J., Papanicolaou, A., Yassour, M., Grabherr, M., Blood, P. D., Bowden, J., Couger, M. B.,**  
595 **Eccles, D., Li, B., Lieber, et al.** (2013). *De novo* transcript sequence reconstruction from RNA-seq  
596 using the Trinity platform for reference generation and analysis. *Nat Protoc.* **8**, 1494-1512.
- 597 **Hand, S. C., Denlinger, D. L., Podrabsky, J. E. and Roy, R.** (2016). Mechanisms of animal diapause:  
598 recent developments from nematodes, crustaceans, insects, and fish. *Am. J. Physiol. Regul. Integr.*  
599 *Comp. Physiol.* **310**, R1193-R1211.
- 600 **Harbach R. E.** (2012). *Culex pipiens*: species versus species complex taxonomic history and perspective.  
601 *J. Am. Mosq. Control Assoc.* **28**, 10-23.
- 602 **Ikeno, T., Tanaka, S. I., Numata, H. and Goto, S. G.** (2010). Photoperiodic diapause under the control  
603 of circadian clock genes in an insect. *BMC Biol.* **8**, 116.
- 604 **Jackman, S. D., Vandervalk, B. P., Mohamadi, H., Chu, J., Yeo, S., Hammond, S. A., Jahesh, G.,**  
605 **Khan, H., Coombe, L., Warren, R. L. and Birol, I.** (2017). ABySS 2.0: resource-efficient assembly  
606 of large genomes using a Bloom filter. *Genome Res.* **27**, 768-777.
- 607 **Kang, D. S., Cotten, M. A., Denlinger, D. L. and Sim, C.** (2016). Comparative transcriptomics reveals  
608 key gene expression differences between diapausing and non-diapausing adults of *Culex pipiens*. *PloS*  
609 *One.* **11**, e0154892.

- 610 **Karpova, S. G.** (2009). Effect of light and temperature on the daily rhythm of adult eclosion in the blood-  
611 sucking mosquitoes *Aedes communis* De Geer and *Culex pipiens* L. (Diptera, Culicidae). Entomol.  
612 Rev. **89**, 377-389.
- 613 **Kassim, N. F. A., Webb, C. E., Wang, Q. and Russell, R. C.** (2013). Australian distribution, genetic  
614 status and seasonal abundance of the exotic mosquito *Culex molestus* (Forskal) (Diptera: Culicidae).  
615 Aust. J. Entomol. **52**, 185-198.
- 616 **King, B., Li, S., Liu, C., Kim, S. J. and Sim, C.** (2020). Suppression of glycogen synthase expression  
617 reduces glycogen and lipid storage during mosquito overwintering diapause. J. Insect Physiol. **120**,  
618 103971.
- 619 **Kyriacou, C. P., Peixoto, A. A., Sandrelli, F., Costa, R. and Tauber, E.** (2008). Clines in clock genes:  
620 fine-tuning circadian rhythms to the environment. Trends Genet. **24**, 124-132.
- 621 **Li, H.** (2013). Aligning sequence reads, clone sequences and assembly contigs with BWA-MEM. arXiv  
622 1303.3997v2.
- 623 **Li, B. and Dewey, C. N.** (2011). RSEM: accurate transcript quantification from RNA-Seq data with or  
624 without a reference genome. BMC bioinformatics. **12**, 323.
- 625 **Li, H., Handsaker, B., Wysoker, A., Fennell, T., Ruan, J., Homer, N., Marth, G., Abecasis, G., Durbin,  
626 R., & 1000 Genome Project Data Processing Subgroup** (2009). The Sequence Alignment/Map  
627 format and SAMtools. Bioinformatics. **25**, 2078-2079.
- 628 **Lian, S., Li, Q., Dai, Z., Xiang, Q. and Dai, X.** (2014). A *de novo* genome assembly algorithm for repeats  
629 and nonrepeats. Biomed Res Int. **2014**, 736473.
- 630 **Liu, Z., Tabuloc, C. A., Xue, Y., Cai, Y., McIntire, P., Niu, Y., Lam, V. H., Chiu, J. C. and Zhang, Y.**  
631 (2019). Splice variants of DOMINO control *Drosophila* circadian behavior and pacemaker neuron  
632 maintenance. PLoS Genet. **15**, e1008474.
- 633 **Martinek, S., Inonog, S., Manoukian, A. S. and Young, M. W.** (2001). A role for the segment polarity  
634 gene shaggy/GSK-3 in the *Drosophila* circadian clock. Cell. **105**, 769-779.
- 635 **Mauro, A. A. and Ghalambor, C. K.** (2020) Trade-offs, pleiotropy, and shared molecular pathways: A  
636 unified view of constraints on adaptation. Integr. Comp. Biol. **60**, 332-347.
- 637 **McKenna, A., Hanna, M., Banks, E., Sivachenko, A., Cibulskis, K., Kernytzky, A., Garimella, K.,  
638 Altshuler, D., Gabriel, S., Daly, M. and DePristo, M. A.** (2010). The Genome Analysis Toolkit: a  
639 MapReduce framework for analyzing next-generation DNA sequencing data. Genome Res. **20**, 1297-  
640 1303.
- 641 **Meireles-Filho, A. C. and Kyriacou, C. P.** (2013). Circadian rhythms in insect disease vectors. Mem. Inst.  
642 Oswaldo Cruz. **108 Suppl 1**, 48-58.



- 643 **Meuti, M. E. and Denlinger, D. L.** (2013). Evolutionary links between circadian clocks and photoperiodic  
644 diapause in insects. *Integr. Comp. Biol.* **53**, 131-143.
- 645 **Meuti, M. E., Stone, M., Ikeno, T. and Denlinger, D. L.** (2015). Functional circadian clock genes are  
646 essential for the overwintering diapause of the Northern house mosquito, *Culex pipiens*. *J. Exp. Bio.*  
647 **218**, 412-422.
- 648 **Nelms, B. M., Kothera, L., Thiemann, T., Macedo, P. A., Savage, H. M., and Reisen, W. K.** (2013).  
649 Phenotypic variation among *Culex pipiens* complex (Diptera: Culicidae) populations from the  
650 Sacramento Valley, California: horizontal and vertical transmission of West Nile virus, diapause  
651 potential, autogeny, and host selection. *Am. J. Trop. Med. Hyg.* **89**, 1168-1178.
- 652 **Price, D. C. and Fonseca, D. M.** (2015). Genetic divergence between populations of feral and domestic  
653 forms of a mosquito disease vector assessed by transcriptomics. *PeerJ* **3**, e807.
- 654 **R Core Team** (2020). R: A language and environment for statistical computing. R Foundation for  
655 Statistical Computing, Vienna, Austria. URL <https://www.R-project.org/>.
- 656 **Richards, A. G.** (1941). A stenogamic autogenous strain of *Culex pipiens* L. in North America (Diptera:  
657 Culicidae). *Ent. News.* **52**, 211-216.
- 658 **Ruhf, M. L., Braun, A., Papoulas, O., Tamkun, J. W., Randsholt, N. and Meister, M.** (2001). The  
659 domino gene of *Drosophila* encodes novel members of the SWI2/SNF2 family of DNA-dependent  
660 ATPases, which contribute to the silencing of homeotic genes. *Development.* **128**, 1429-1441.
- 661 **Rund, S. S., O'Donnell, A. J., Gentile, J. E. and Reece, S. E.** (2016). Daily Rhythms in Mosquitoes and  
662 Their Consequences for Malaria Transmission. *Insects.* **7**, 14.
- 663 **Schneider, C. A., Rasband, W. S. and Eliceiri, K. W.** (2012). NIH Image to ImageJ: 25 years of image  
664 analysis. *Nat. Methods.* **9**, 671-675.
- 665 **Shaikevich, E. V.** (2007). PCR-RFLP of the COI gene reliably differentiates *Cx. pipiens*, *Cx. pipiens f.*  
666 *molestus* and *Cx. torrentium* of the Pipiens Complex. *Eur. Mosq. Bull.* **23**, 25-30.
- 667 **Sim, C. and Denlinger, D. L.** (2008). Insulin signaling and FOXO regulate the overwintering diapause of  
668 the mosquito *Culex pipiens*. *Proc. Natl. Acad. Sci. USA* **105**, 6777-6781.
- 669 **Smith, J. L. and Fonseca, D. M.** (2004). Rapid assays for identification of members of the *Culex* (*Culex*)  
670 *pipiens* complex, their hybrids, and other sibling species (Diptera: culicidae). *Am. J. Trop. Med. Hyg.*  
671 **70**, 339-345.
- 672 **Spielman, A.** (1971). Bionomics of autogenous mosquitoes. *Annu. Rev. Entomol.* **16**, 231-248.
- 673 **Spielman, A. and Wong, J.** (1973). Environmental Control of Ovarian Diapause in *Culex pipiens*. *Ann.*  
674 *Entomol. Soc. Am.* **66**, 905-907.
- 675 **Takele Assefa, A., Vandesompele, J. and Thas, O.** (2020). On the utility of RNA sample pooling to  
676 optimize cost and statistical power in RNA sequencing experiments. *BMC genomics.* **21**, 312.

- 677 **Tate, P. and Vincent, M.** (1936). The biology of autogenous and anautogenous races of *Culex pipiens*.  
678 *Parasitology* **28**, 115-145.
- 679 **Tauber, M. J. and Tauber, C. A.** (1976). Insect seasonality: diapause maintenance, termination, and  
680 postdiapause development. *Annu. Rev. Entomol.* **21**, 81-107.
- 681 **Tauber, M. J. and Tauber, C. A.** (1981). Insect seasonal cycles: genetics and evolution. *Ann. Rev. Ecol.*  
682 *Syst.* **12**, 281-308.
- 683 **Thimngan, M. S., Seugnet, L., Turk, J. and Shaw, P. J.** (2015). Identification of genes associated with  
684 resilience/vulnerability to sleep deprivation and starvation in *Drosophila*. *Sleep.* **38**, 801-814.
- 685 **Thurmond, J., Goodman, J. L., Strelets, V. B., Attrill, H., Gramates, L. S., Marygold, S. J., Matthews,**  
686 **B. B., Millburn, G., Antonazzo, G., Trovisco, et al.** (2019). FlyBase 2.0: the next generation. *Nucleic*  
687 *Acids Res.* **47**, D759–D765.
- 688 **Vinogradova, E. B.** (2000). *Culex pipiens pipiens Mosquitoes: Taxonomy, Distribution, Ecology,*  
689 *Physiology, Genetics, Applied Importance and Control.* Sofia, Bulgaria: Pensoft Publishers.
- 690 **Yerushalmi, S. and Green, R. M.** (2009). Evidence for the adaptive significance of circadian rhythms.  
691 *Ecol. Lett.* **12**, 970-981.
- 692 **Yurchenko, A. A., Masri, R. A., Khrabrova, N. V., Sibataev, A. K., Fritz, M. L. and Sharakhova, M.**  
693 **V.** (2020). Genomic differentiation and intercontinental population structure of mosquito vectors  
694 *Culex pipiens pipiens* and *Culex pipiens molestus*. *Sci. Rep.* **10**, 7504.
- 695 **Zhou, G. and Miesfeld, R. L.** (2009). Energy metabolism during diapause in *Culex pipiens* mosquitoes. *J.*  
696 *Insect Physiol.* **55**, 40-46.
- 697
- 698
- 699
- 700
- 701
- 702
- 703
- 704
- 705
- 706
- 707

708 **Tables**

709 **Table 1.** *Culex* circadian genes found to harbor a fixed, derived amino acid change (missense mutation) in  
 710 both a New York City (NYC, USA) and Minsk (Belarus) *Cx. molestus* sample. The derived state was  
 711 determined in relations to the annotated reference of *Cx. quinquefasciatus*. The *Cx. pipiens* samples derive  
 712 from New Jersey (NJ, USA) and Minsk (Belarus). For more details, see Table S5.

713

| <i>Cx. quinque.</i><br>Reference<br>Gene ID | Length<br>of<br>Gene<br>(AAs) | Amino<br>Acids<br>Analyzed | NYC<br>( <i>m.</i> ) | Belarus<br>( <i>m.</i> ) | Both<br><i>molestus</i> | NJ<br>( <i>p.</i> ) | Belarus<br>( <i>p.</i> ) | Both<br><i>pipiens</i> | <i>Cx. quinque.</i> Gene<br>Annotation                 |
|---------------------------------------------|-------------------------------|----------------------------|----------------------|--------------------------|-------------------------|---------------------|--------------------------|------------------------|--------------------------------------------------------|
| CPIJ003689                                  | 244                           | 213                        | 0                    | 0                        | 1                       | 0                   | 0                        | 1                      | calmodulin binding<br>transcription<br>activator 2     |
| CPIJ015063                                  | 618                           | 605                        | 1                    | 1                        | 1                       | 0                   | 0                        | 1                      | sodium chloride<br>dependent amino<br>acid transporter |
| CPIJ009455                                  | 499                           | 417                        | 1                    | 1                        | 1                       | 2                   | 1                        | 0                      | dna photolyase                                         |
| CPIJ005741                                  | 1295                          | 699                        | 0                    | 0                        | 1                       | 0                   | 3                        | 3                      | calmodulin-<br>binding protein trpl                    |
| CPIJ005000                                  | 378                           | 261                        | 1                    | 1                        | 1                       | 0                   | 0                        | 0                      | ultraviolet-<br>sensitive opsin                        |
| CPIJ006114                                  | 503                           | 495                        | 1                    | 0                        | 1                       | 2                   | 0                        | 0                      | glycogen synthase<br>kinase 3                          |
| CPIJ000778                                  | 1069                          | 870                        | 2                    | 1                        | 1                       | 1                   | 0                        | 0                      | phospholipase c                                        |
| CPIJ016941                                  | 577                           | 417                        | 0                    | 0                        | 1                       | 0                   | 1                        | 0                      | conserved<br>hypothetical<br>protein                   |

714

715

716

717

718

719

720

721

722

723

724 **Table 2.** *Culex* circadian genes that were either not expressed in any *Cx. molestus* life history stage  
725 (Transcripts per Kilobase Million [TPM] = 0, bolded rows), or else in which TPM was < 1.0 for only one  
726 life stage. For more details, see Table S6.

727

| Gene ID           | Larvae TPM | Pre-pupae TPM | Pupae TPM | Adult TPM | <i>Cx. quinque.</i> Gene Annotation                               |
|-------------------|------------|---------------|-----------|-----------|-------------------------------------------------------------------|
| CPIJ002636        | 0          | 0             | 0.15      | 0         | protein kinase                                                    |
| CPIJ005003        | 0          | 0.17          | 0         | 0         | Predicted protein                                                 |
| <b>CPIJ010494</b> | <b>0</b>   | <b>0</b>      | <b>0</b>  | <b>0</b>  | <b>AMP dependent ligase</b>                                       |
| CPIJ011756        | 0          | 0             | 0.57      | 0         | uncharacterized protein                                           |
| <b>CPIJ012634</b> | <b>0</b>   | <b>0</b>      | <b>0</b>  | <b>0</b>  | <b>tubulin beta-3 chain</b>                                       |
| <b>CPIJ014803</b> | <b>0</b>   | <b>0</b>      | <b>0</b>  | <b>0</b>  | <b>Dual specificity tyrosine-phosphorylation-regulated kinase</b> |
| <b>CPIJ014875</b> | <b>0</b>   | <b>0</b>      | <b>0</b>  | <b>0</b>  | <b>uncharacterized protein</b>                                    |
| CPIJ015063        | 0          | 0             | 0         | 0.15      | sodium/chloride dependent amino acid transporter                  |
| CPIJ015933        | 0          | 0             | 0         | 0.22      | expressed protein                                                 |
| CPIJ017982        | 0          | 0             | 0         | 0.46      | casein kinase I isoform alpha                                     |

728

729

730

731

732

733

734

735

736

737

738

739

740

741

742

743 **Figures**

744 **Figure 1.** An alignment showing the nine nucleotide, in-frame deletion in the *Cx. molestus* Helicase domino  
745 (*dom*) gene. This deletion is located in exon 5, between nucleotides 838 to 846 (in relation to the annotated  
746 gene sequence in *Cx. quinquefasciatus*). The one letter codes for the corresponding amino acids are also  
747 given below each nucleotide sequence. The sample taxa, geographic origin, and data type are given to the  
748 left of each nucleotide/amino acid combination.

749

750 **Figure 2.** The distribution of adult eclosion times for each of our four treatments (12hours:12hours  
751 light:dark; 12 hours:12hours dark:light; 24 hours light; 24 hours dark). The dots around each compass  
752 represent one emergence on a 24-hour clock. The red arrows within each compass indicate the mean  
753 emergence time. In the middle of each compass is a rose diagram with 12 bins showing the circular  
754 distribution of emergence times. Grey areas of the compasses indicate periods of time when the larvae for  
755 each treatment were in darkness. To the lower right-hand side of each compass is a linear histogram of  
756 emergence times divided across 24 hours (from 0:00 [midnight] to 23:59). The red lines indicate the density  
757 distribution of emergences. The numbers above each liner histogram indicate sample sizes.

758

759 **Figure 3.** Scatter plot indicating the relationship between adult female wing size and the number of eggs  
760 laid. Data from females reared in short day conditions (6:18 Light:Dark) are indicated with green diamonds,  
761 and data from females reared in long day conditions (18:6 Light:Dark) are indicated with orange circles.  
762 The linear regression lines and  $R^2$  values for each dataset are also given. An example egg raft is shown in  
763 the upper left corner of the figure.

764

765

766

767

768

769 **Supplementary information**

770 **Table S1.** GO term IDs from *Drosophila melanogaster*, with corresponding definition (biological process).

771 These terms were used to locate likely *Culex* circadian genes.

| Go Term    | Definition                                                 |
|------------|------------------------------------------------------------|
| GO:0003052 | circadian regulation of systemic arterial blood pressure   |
| GO:0003053 | circadian regulation of heart rate                         |
| GO:0007623 | circadian rhythm                                           |
| GO:0009416 | response to light stimulus                                 |
| GO:0009583 | detection of light stimulus                                |
| GO:0009648 | photoperiodism                                             |
| GO:0009649 | entrainment of circadian clock                             |
| GO:0009793 | embryo development ending in seed dormancy                 |
| GO:0010162 | seed dormancy process                                      |
| GO:0010231 | maintenance of seed dormancy                               |
| GO:0010840 | regulation of circadian sleep/wake cycle, wakefulness      |
| GO:0022410 | circadian sleep/wake cycle process                         |
| GO:0022611 | dormancy process                                           |
| GO:0042320 | regulation of circadian sleep/wake cycle, REM sleep        |
| GO:0042321 | negative regulation of circadian sleep/wake cycle, sleep   |
| GO:0042749 | regulation of circadian sleep/wake cycle                   |
| GO:0042752 | regulation of circadian rhythm                             |
| GO:0042753 | positive regulation of circadian rhythm                    |
| GO:0042754 | negative regulation of circadian rhythm                    |
| GO:0045187 | regulation of circadian sleep/wake cycle, sleep            |
| GO:0045188 | regulation of circadian sleep/wake cycle, non-REM sleep    |
| GO:0045938 | positive regulation of circadian sleep/wake cycle, sleep   |
| GO:0048512 | circadian behavior                                         |
| GO:0048571 | long-day photoperiodism                                    |
| GO:0048572 | short-day photoperiodism                                   |
| GO:0048573 | photoperiodism, flowering                                  |
| GO:0048586 | regulation of long-day photoperiodism, flowering           |
| GO:0048587 | regulation of short-day photoperiodism, flowering          |
| GO:0050953 | sensory perception of light stimulus                       |
| GO:0050962 | detection of light stimulus involved in sensory perception |
| GO:0055115 | entry into diapause                                        |
| GO:0061963 | regulation of entry into reproductive diapause             |
| GO:0071482 | cellular response to light stimulus                        |
| GO:0071981 | exit from diapause                                         |
| GO:0071982 | maintenance of diapause                                    |
| GO:0097437 | maintenance of dormancy                                    |
| GO:0097438 | exit from dormancy                                         |
| GO:2000028 | regulation of photoperiodism, flowering                    |
| GO:2000033 | regulation of seed dormancy process                        |

772

773

774 **Table S2.** List of 154 *Culex* circadian genes (annotated in *Cx. quinquefasciatus*) investigated for structural  
775 variants, non-synonymous nucleotide changes (missense mutations) and absence of expression in *Cx.*  
776 *molestus*.

777

778 See spreadsheet

779

780 **Table S3.** List of *Culex* datasets used in this study with taxonomic designation, geographic origin of sample,  
781 data type, SRA number(s), and which analyses the data were used for. Also included is detailed information  
782 on the *Cx. quinquefasciatus* reference genome (with coding sequence annotation) used in this study.

783

784 See spreadsheet

785

786 **Table S4.** *Culex* circadian genes (annotated from *Cx. quinquefasciatus*) that contained potential ‘high-  
787 impact’ variants (see text for definition). Only one of these genes, Domino helicase, was determined to be  
788 a true biological variant, present in all examined *Cx. molestus* samples, and absent in all examined *Cx.*  
789 *pipiens* samples. The other 32 genes were either flagged due to absence in some *Cx. molestus* samples,  
790 presence in some/all *Cx. pipiens* samples, or inaccurate annotation of the *Cx. quinquefasciatus* genome.  
791 Also given are the gene ID, genome location of the gene, and the type of variant(s) observed.

792

793 See spreadsheet

794

795 **Table S5.** All *Culex* circadian genes (annotated from *Cx. quinquefasciatus*) that were previously found to  
796 have a Ka value greater than 0 in a comparison between *Cx. molestus* and *Cx. pipiens* (Price and Fonseca,  
797 2015). The Amino Acid (AA) length of the annotated gene is given, as well as the number of amino acids  
798 analyzed here. Only amino acids that were present in all assessed genomes (i.e. no missing data or INDELS)  
799 and that which did not have a codon that spanned an intron were included. The number of derived amino

800 acid changes observed in each sample or else multiple samples (depending on grouping of interest [taxon  
801 or geographic origin]). No observed amino acid is listed more than once. The derived amino acids of interest  
802 for this study are those that were observed in both North American and European *Cx. molestus* genomes,  
803 but neither geographically comparable *Cx. pipiens* genome (column F, highlighted in grey). Rows  
804 representing genes which contained an amino acid change in this category are bolded. For these genes we  
805 also include the likely *Drosophila melanogaster* homolog parent gene ID (based on our ‘blastp’ analysis),  
806 likely *D. melanogaster* homolog gene name, GO Terms associated with that gene, and these GO Term  
807 definitions.

808

809 See spreadsheet

810

811 **Table S6.** *Culex* circadian genes (annotated from *Cx. quinquefasciatus*) that were found to either exhibit  
812 no expression in any surveyed *Cx. molestus* life-stage (larvae, pre-pupae, pupae, or adult), or else in only  
813 one life-stage at a level below 1.0 Transcripts per Kilobase Million (TPM) and 1.0 Fragments Per Kilobase  
814 of transcript per Million mapped reads (FPKM). Also given are the *Cx. quinquefasciatus* gene annotations,  
815 likely *D. melanogaster* homolog parent gene ID (based on our ‘blastp’ analysis), likely *Drosophila* homolog  
816 gene name, GO Terms associated with that gene, and these GO Term definitions.

817

818 See spreadsheet

819

820 **Figure S1.** Focusing on the far left vile, this figure shows: A) *Cx. molestus* pupae before emergence B) *Cx.*  
821 *molestus* adult after emergence. The red arrows indicate the position of the pupae/adult respectively.



## Figures

**Figure 1.** An alignment showing the nine nucleotide, in-frame deletion in the *Cx. molestus* Helicase domino (*dom*) gene. This deletion is located in exon 5, between nucleotides 838 to 846 (in relation to the annotated gene sequence in *Cx. quinquefasciatus*). The one letter codes for the corresponding amino acids are also given below each nucleotide sequence. The sample taxa, geographic origin, and data type are given to the left of each nucleotide/amino acid combination.

**Figure 2.** The distribution of adult eclosion times for each of our four treatments (12hours:12hours light:dark; 12 hours:12hours dark:light; 24 hours light; 24 hours dark). The dots around each compass represent one emergence on a 24-hour clock. The red arrows within each compass indicate the mean emergence time. In the middle of each compass is a rose diagram with 12 bins showing the circular distribution of emergence times. Grey areas of the compasses indicate periods of time when the larvae for each treatment were in darkness. To the lower right-hand side of each compass is a linear histogram of emergence times divided across 24 hours (from 0:00 [midnight] to 23:59). The red lines indicate the density distribution of emergences. The numbers above each liner histogram indicate sample sizes.

**Figure 3.** Scatter plot indicating the relationship between adult female wing size and the number of eggs laid. Data from females reared in short day conditions (6:18 Light:Dark) are indicated with green diamonds, and data from females reared in long day conditions (18:6 Light:Dark) are indicated with orange circles. The linear regression lines and  $R^2$  values for each dataset are also given. An example egg raft is shown in the upper left corner of the figure.

**Figure 1.**

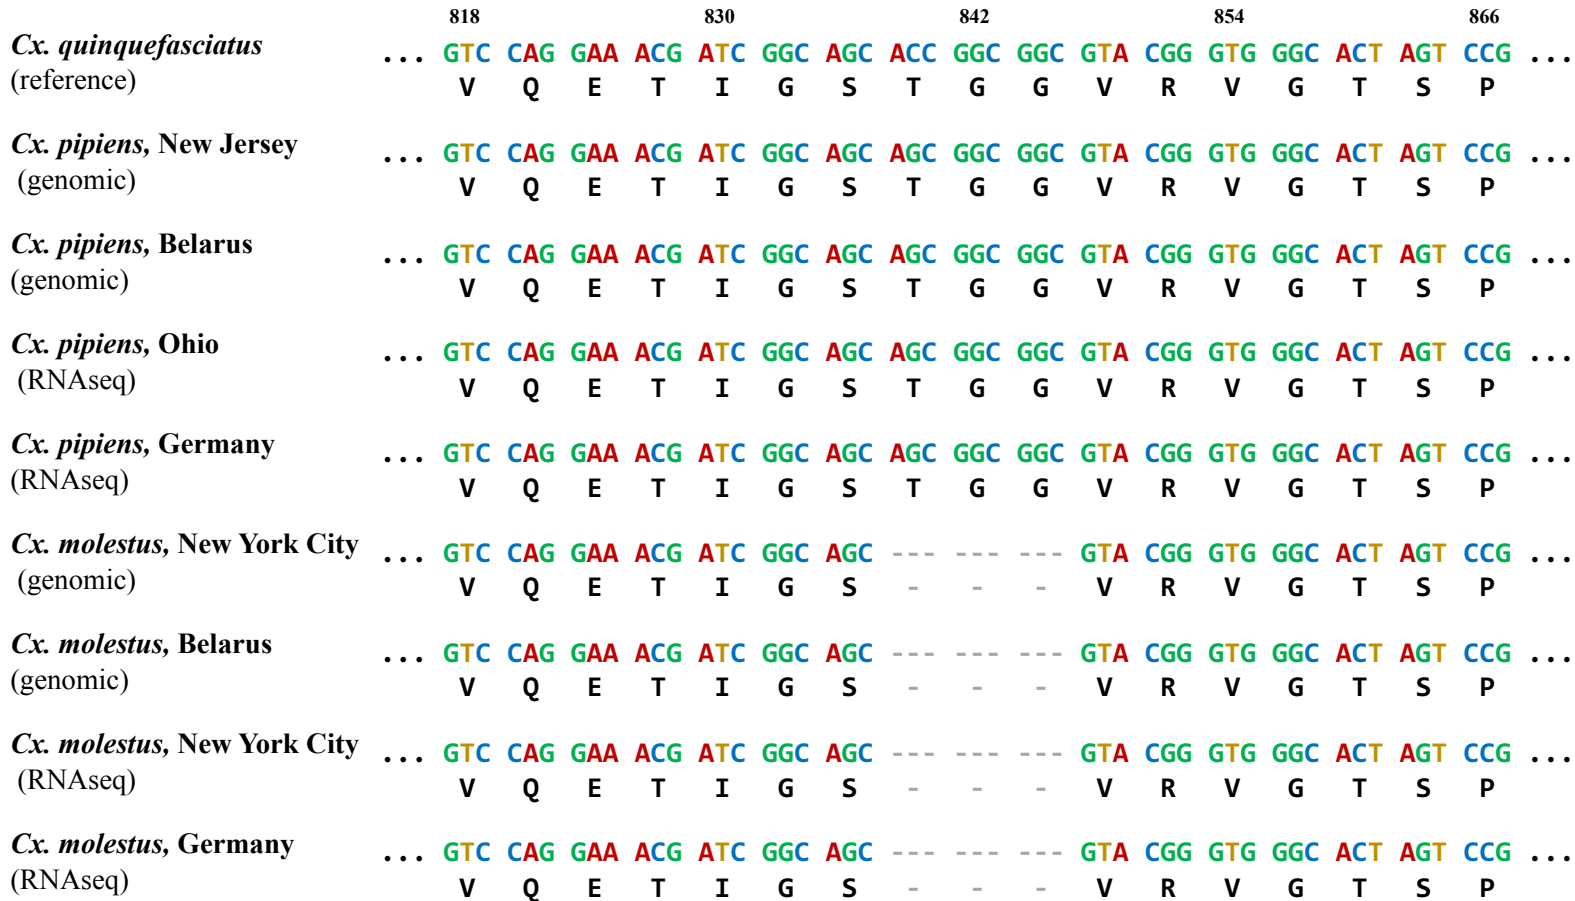

**Figure 2.**

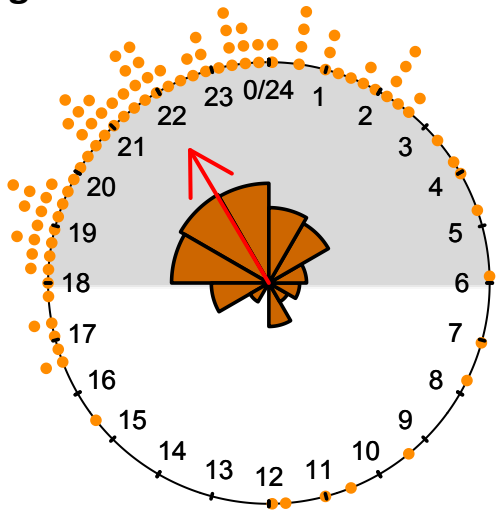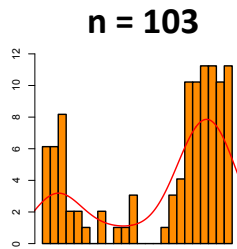

**12:12 Light:Dark**

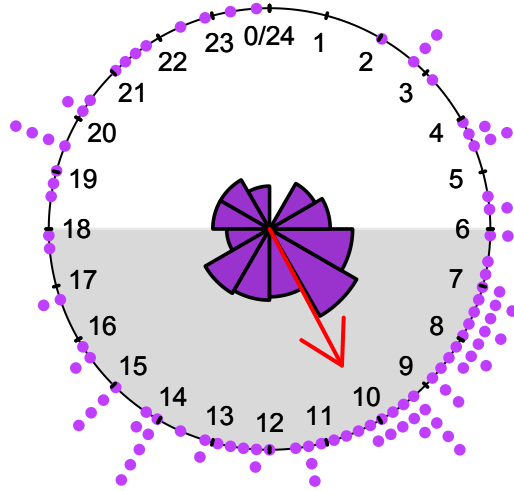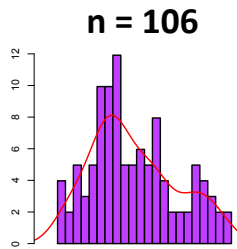

**12:12 Dark:Light**

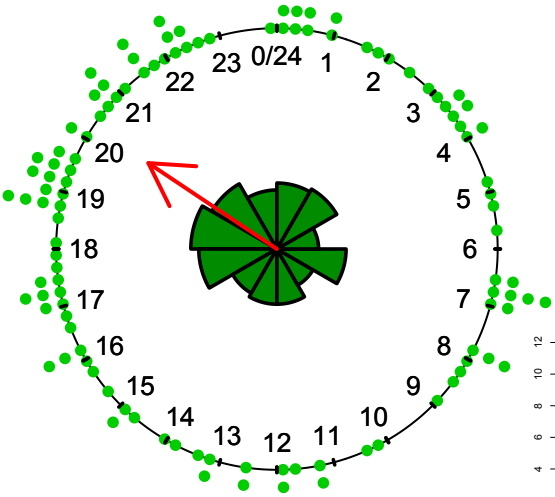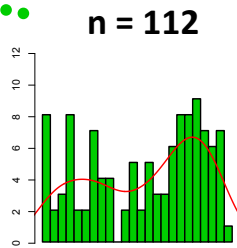

**24 Hours Light**

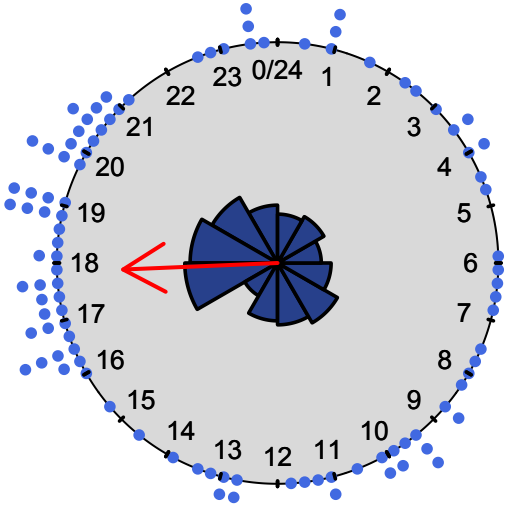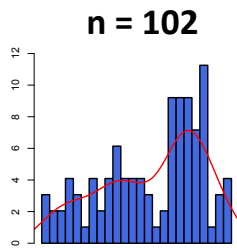

**24 Hours Dark**

Figure 3.

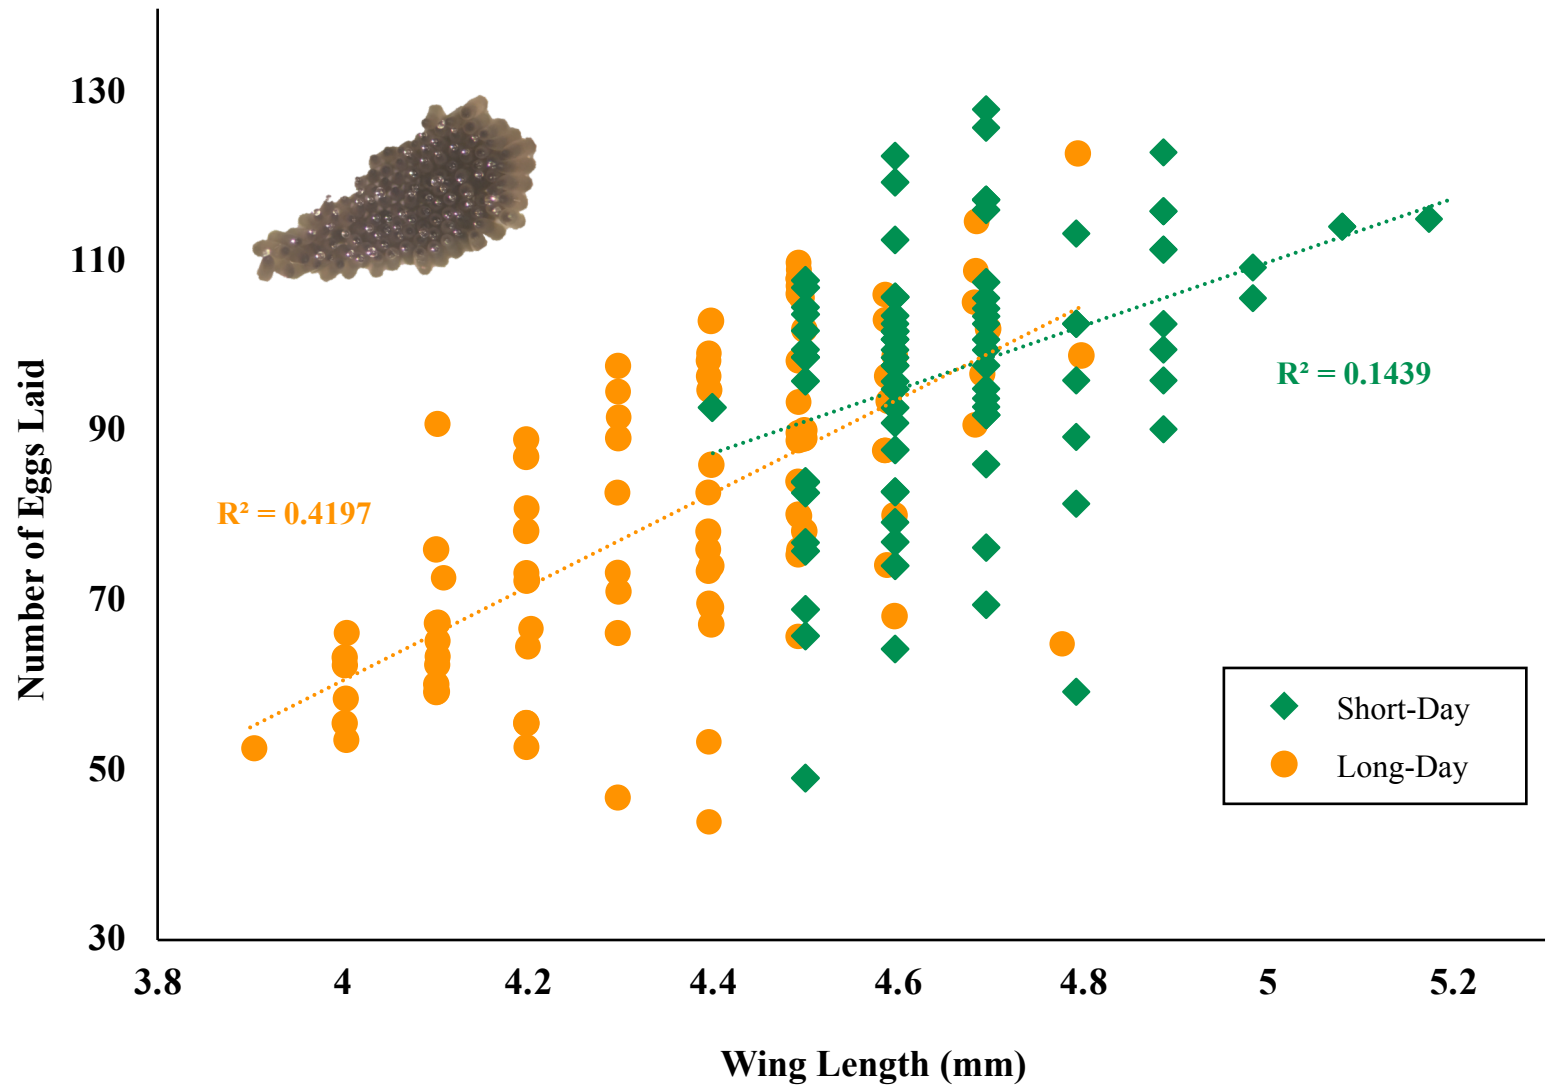

Source: https://www.biorxiv.org/content/10.1101/2020.10.02.323824v1.full.pdf
